# Supplementary material for: Novel dual superlyophobic materials in water–oil systems: under oil magneto-fluid transportation and oil–water separation
Source: Royal Society of Chemistry journal article supplement (doi:10.1039/c7ta10739k), 2018-01-01
Supplement: c7ta10739k1.pdf [file c7ta10739k1.pdf]

**Supporting information for:**

**Novel Dual Superlyophobic Materials in Water-Oil Systems: Under Oil Magneto-fluid**

**Transportation and Oil-Water Separation**

Chang-Lian Xu, Yu-Zhong Wang\*

Center for Degradable and Flame-Retardant Polymeric Materials (ERCPM-MoE), College of Chemistry, State Key Laboratory of Polymer Materials Engineering, National Engineering Laboratory of Eco-Friendly Polymeric Materials (Sichuan), Sichuan University, Chengdu 610064, China.

\*Corresponding author. E-mail: yzwang@scu.edu.cn.

Tel: 86-28-85410755; Fax: 86-28-85410755

**Figures:**

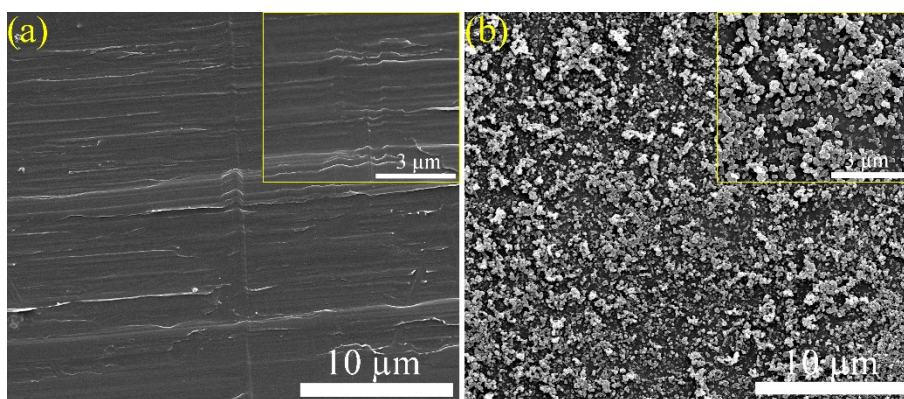

**Figure S1.** FE-SEM images of the sample obtained as the same synthetic feed ratio (catechol and

HMT) and condition of PI-6 without the feed of  $\text{FeSO}_4$ . (a) hydrothermal synthesis of 3 h and (b) hydrothermal synthesis of 24 h.

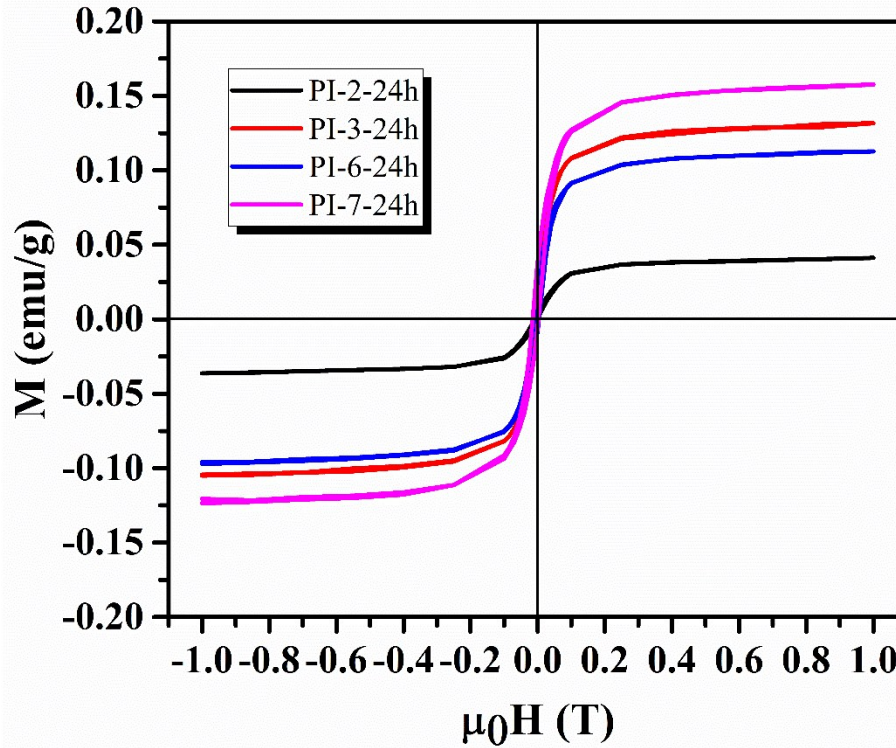

**Figure S2.** VSM profiles of samples obtained from the autoclaves of preparing PI-2-24h, PI-3-24h, PI-6-24h and PI-7-24h films. No signals were detected for the samples taken from the autoclaves of preparing PI-2, PI-3, PI-6, and PI-7 films.

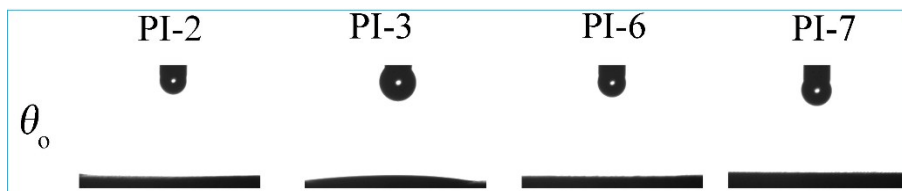

**Figure S3.** Illustration of represent  $\theta_0$  (hexane CA) in air. The  $\theta_0$  for PI-2, PI-3, PI-6 and PI-7 are all nearly zero. The petroleum ether and dichloromethane CAs in air are not shown any more since they are also closed to zero.

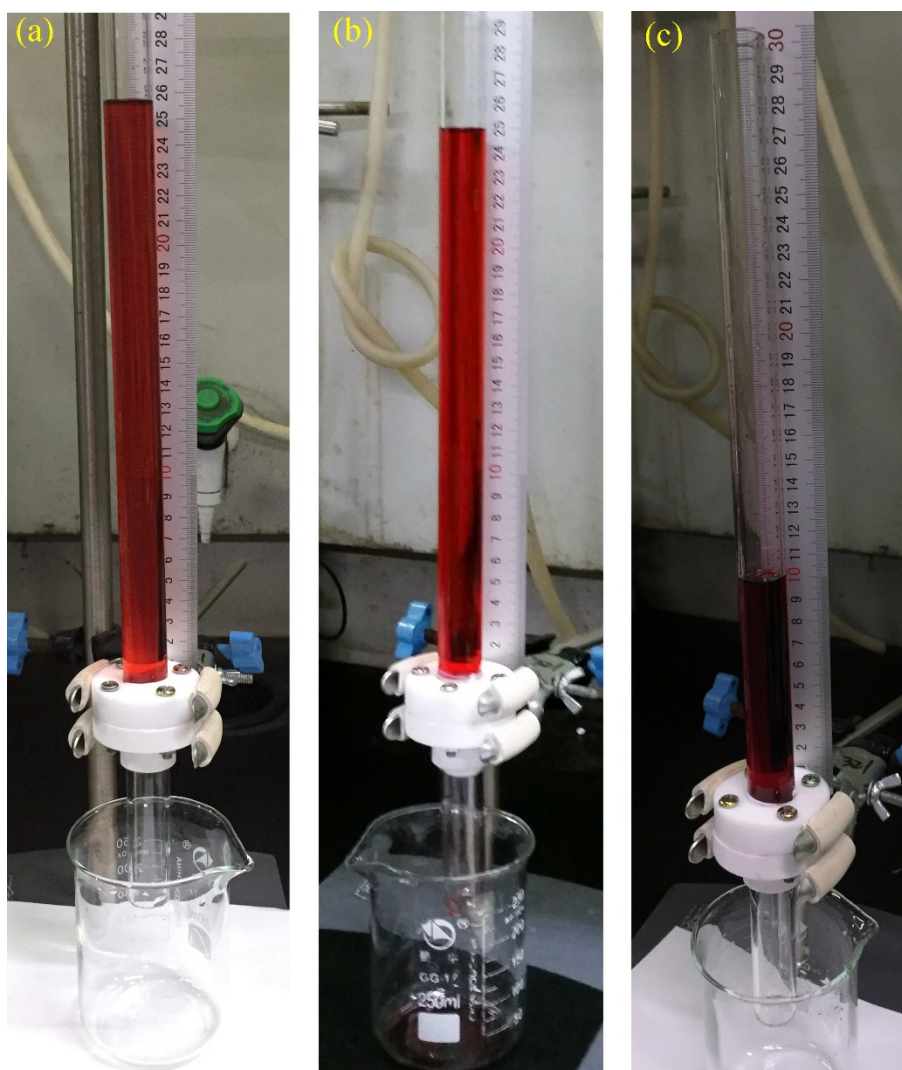

**Figure S4.** The experimental intrusion pressures of (a) hexane, (b) petroleum ether and (c)

dichloromethane.
